# Supplementary material for: Higher-level phylogeny of paraneopteran insects inferred from mitochondrial genome sequences
Source: PubMed Central journal article supplement (PMC4336943; doi:10.1038/srep08527), 2015-02-23
Supplement: srep08527-s1.pdf [file srep08527-s1.pdf]

# Higher-level phylogeny of paraneopteran insects inferred from mitochondrial genome sequences

Hu Li<sup>1,2\*</sup>, Renfu Shao<sup>3\*§</sup>, Nan Song<sup>1,4</sup>, Fan Song<sup>1</sup>, Pei Jiang<sup>1</sup>, Zhihong Li<sup>1</sup>, Wanzhi Cai<sup>1§</sup>

<sup>1</sup>Department of Entomology, China Agricultural University, Beijing 100193, China

<sup>2</sup>Department of Ornamental Horticulture, China Agricultural University, Beijing, 100193, China

<sup>3</sup>GeneCology Research Centre, Faculty of Science, Health, Education and Engineering, University of the Sunshine Coast, Maroochydore, Queensland, Australia

<sup>4</sup>College of Plant Protection, Henan Agricultural University, Zhengzhou, Henan 450002, China

\* These authors contributed equally to this work.

§Correspondence and requests for materials should be addressed to R. S. (rshao@usc.edu.au) and W. C. (caiwz@cau.edu.cn).

**Supplementary Information**

**Supplementary Table S1.** Posterior predictive analyses of compositional homogeneity.

| Taxon                             | PCG     |         | AA      |         | PCGRNA  |         |
|-----------------------------------|---------|---------|---------|---------|---------|---------|
|                                   | p-value | z-score | p-value | z-score | p-value | z-score |
| <i>Alloeorhynchus bakeri</i>      | 0       | 4.515   | 0       | 5.783   | 0       | 3.65    |
| <i>Frankliniella occidentalis</i> | 0       | 8.312   | 0       | 10.677  | 0       | 12.146  |
| <i>Heterodoxus macropus</i>       | 0       | 13.889  | 0       | 4.825   | 0       | 17.642  |
| <i>Ibidoeus bisignatus</i>        | 0       | 12.24   | 0       | 7.866   | 0       | 12.176  |
| <i>Liposcelis bostrychophila</i>  | 0       | 40.494  | 0       | 11.754  | 0       | 33.871  |
| <i>Pachypsylla venusta</i>        | 0.04    | 2.707   | 0       | 5.428   | 0.1     | 1.525   |
| <i>Schizaphis graminum</i>        | 0       | 166.3   | 0       | 63.495  | 0       | 180.637 |
| <i>Hackeriella veitchi</i>        | 0       | 83.348  | 0       | 22.198  | 0       | 97.799  |
| <i>Frankliniella intonsa</i>      | 0       | 5.011   | 0       | 25.447  | 0       | 7.171   |
| <i>Liposcelis decolor</i>         | 0       | 7.204   | 0       | 6.285   | 0       | 10.266  |
| <i>Thrips imaginis</i>            | 0       | 5.573   | 0       | 12.233  | 0.02    | 3.353   |
| <i>Abidama producta</i>           | 0       | 13.047  | 0       | 9.589   | 0       | 19.658  |
| <i>Acyrtosiphon pisum</i>         | 0       | 170.212 | 0       | 64.061  | 0       | 189.182 |

|                                                                         |     |         |   |        |      |         |
|-------------------------------------------------------------------------|-----|---------|---|--------|------|---------|
| <i>Bothriometopus macrocnemis</i>                                       | 0   | 19.45   | 0 | 13.522 | 0    | 21.308  |
| <i>Campanulotes bidentatus</i>                                          | 0   | 167.819 | 0 | 67.073 | 0    | 87.246  |
| <i>Psococerastis albimaculata</i>                                       | 0   | 19.744  | 0 | 7.466  | 0    | 6.434   |
| <i>Longivalvus hyalospilus</i>                                          | 0.7 | -0.649  | 0 | 9.591  | 0.11 | 0.902   |
| <i>Stenopirates sp.</i>                                                 | 0   | 158.955 | 0 | 48.082 | 0    | 109.476 |
| <i>Gerris sp.</i>                                                       | 0   | 6.561   | 0 | 10.052 | 0    | 5.242   |
| <i>Halyomorpha halys</i>                                                | 0   | 4.141   | 0 | 4.389  | 0    | 5.034   |
| <i>Homalodisca vitripennis</i>                                          | 0   | 22.075  | 0 | 7.28   | 0    | 15.649  |
| <i>Laccotrephes robustus</i>                                            | 0   | 20.365  | 0 | 11.553 | 0    | 18.202  |
| <i>Lepidopsocid sp.</i>                                                 | 0   | 43.383  | 0 | 9.684  | 0    | 34.746  |
| <i>Leptopus sp.</i>                                                     | 0   | 19.16   | 0 | 12.893 | 0    | 14.837  |
| <i>Lycorma delicatula</i>                                               | 0   | 10.343  | 0 | 25.273 | 0    | 35.89   |
| Total number of species with significantly<br>heterogeneous composition |     | 24      |   | 25     |      | 24      |

---

Z-score >2 indicated taxa was significantly compositional heterogeneous.

**Supplementary Table S2.** Comparison of substitution rates among paraneopteran mitochondrial genomes.

| Taxon                             | $K_a$ | Bayesian branch length | Taxon                          | $K_a$ | Bayesian branch length |
|-----------------------------------|-------|------------------------|--------------------------------|-------|------------------------|
| Lepidopsocid sp.                  | 0.29  | 0.44                   | <i>Schizaphis graminum</i>     | 0.39  | 0.74                   |
| <i>Longivalvus hyalospilus</i>    | 0.31  | 0.49                   | <i>Acyrtosiphon pisum</i>      | 0.39  | 0.75                   |
| <i>Psococerastis albimaculata</i> | 0.31  | 0.48                   | <i>Abidama producta</i>        | 0.29  | 0.39                   |
| <i>Liposcelis bostrychophila</i>  | 0.56  | 1.59                   | <i>Homalodisca vitripennis</i> | 0.34  | 0.57                   |
| <i>Liposcelis decolor</i>         | 0.55  | 1.51                   | <i>Lycorma delicatula</i>      | 0.38  | 0.61                   |
| <i>Bothriometopus macrocnemis</i> | 0.57  | 1.49                   | <i>Hackeriella veitchi</i>     | 0.39  | 0.68                   |
| <i>Campanulotes bidentatus</i>    | 0.57  | 1.49                   | <i>Alloeorhynchus bakeri</i>   | 0.29  | 0.47                   |
| <i>Heterodoxus macropus</i>       | 0.56  | 1.36                   | <i>Laccotrephes robustus</i>   | 0.28  | 0.41                   |
| <i>Ibidoecus bisignatus</i>       | 0.54  | 1.41                   | <i>Halyomorpha halys</i>       | 0.29  | 0.48                   |
| <i>Frankliniella occidentalis</i> | 0.42  | 0.97                   | <i>Gerris</i> sp.              | 0.28  | 0.44                   |
| <i>Frankliniella intonsa</i>      | 0.44  | 0.97                   | <i>Stenopirates</i> sp.        | 0.32  | 0.61                   |
| <i>Thrips imaginis</i>            | 0.42  | 0.87                   | <i>Leptopus</i> sp.            | 0.28  | 0.42                   |
| <i>Pachyphylla venusta</i>        | 0.45  | 0.86                   |                                |       |                        |

**Supplementary Table S3.** Posterior predictive analyses of sequence homoplasy.

| Dataset | Model   | Observed Homoplasy | Standard deviation | Predicted Homoplasy | Standard deviation | DH      |
|---------|---------|--------------------|--------------------|---------------------|--------------------|---------|
| AA      | CAT+GTR | 39.5841            | 3.39281            | 39.4143             | 3.40446            | 0.1698  |
|         | CAT     | 24.8026            | 0.96474            | 24.7271             | 0.965398           | 0.0755  |
|         | MtArt   | 19.038             | 0.345349           | 18.7572             | 0.477764           | 0.2808  |
| PCG     | CAT+GTR | 39.4963            | 1.48223            | 39.4715             | 1.49011            | 0.0248  |
|         | CAT     | 33.6196            | 4.46557            | 33.6346             | 4.46117            | -0.015  |
|         | GTR     | 19.5825            | 0.414643           | 19.5531             | 0.426336           | 0.0294  |
| PCGRNA  | CAT+GTR | 34.492             | 2.22629            | 34.4639             | 2.23178            | 0.0281  |
|         | CAT     | 28.4481            | 3.23159            | 28.4706             | 3.23408            | -0.0225 |
|         | GTR     | 17.6091            | 0.294875           | 17.5534             | 0.292151           | 0.0557  |

DH is the difference between the observed and the predicted homoplasy, the closer to the zero, the better.

**Supplementary Table S4.** Species used in this study.

| Order/suborder | Family          | Species <sup>a</sup>                     | GenBank          | Reference |
|----------------|-----------------|------------------------------------------|------------------|-----------|
| Isoptera       | Rhinotermitidae | <i>Reticulitermes virginicus</i>         | NC_009500        | 1         |
| Blattodea      | Ectobiidae      | <i>Blattella germanica</i>               | NC_012901        | 2         |
| Mantodea       | Mantidae        | <i>Tamolanica tamolana</i>               | NC_007702        | 3         |
| Orthoptera     | Acrididae       | <i>Locusta migratoria</i>                | JN858206         | 4         |
| Psocoptera     |                 |                                          |                  |           |
| Trogiomorpha   | Lepidopsocidae  | <b><i>Lepidopsocid</i> sp.</b>           | <b>NC_004816</b> | <b>5</b>  |
| Psocomorpha    | Psocidae        | <b><i>Psococerastis albimaculata</i></b> | <b>NC_021400</b> | <b>6</b>  |
|                |                 | <b><i>Longivalvus hyalospilus</i></b>    | <b>JQ910986</b>  | <b>6</b>  |
| Troctomorpha   | Liposcelidae    | <b><i>Liposcelis bostrychophila</i></b>  | <b>JN645275</b>  | <b>7</b>  |
|                |                 | <b><i>Liposcelis bostrychophila</i></b>  | <b>JN645276</b>  |           |
|                |                 | <i>Liposcelis decolor</i>                | NC_023839        | 8         |
| Phthiraptera   |                 |                                          |                  |           |
| Ischnocera     | Philopteridae   | <i>Bothriometopus macrocnemis</i>        | NC_009983        | 9         |
|                |                 | <b><i>Campanulotes bidentatus</i></b>    | <b>NC_007884</b> | <b>10</b> |

|                 |                 |                                    |                  |                   |
|-----------------|-----------------|------------------------------------|------------------|-------------------|
|                 |                 | <i>Ibidoecus bisignatus</i>        | NC_015999        | 11                |
| Amblycera       | Boopidae        | <b><i>Heterodoxus macropus</i></b> | <b>NC_002651</b> | <b>12</b>         |
| Thysanoptera    | Thripidae       | <b><i>Thrips imaginis</i></b>      | <b>NC_004371</b> | <b>13</b>         |
|                 |                 | <i>Frankliniella occidentalis</i>  | NC_018370        | 14                |
|                 |                 | <i>Frankliniella intonsa</i>       | NC_021378        | 15                |
| Hemiptera       |                 |                                    |                  |                   |
| Sternorrhyncha  | Psyllidae       | <i>Pachypsylla venusta</i>         | NC_006157        | 16                |
|                 | Aphididae       | <i>Schizaphis graminum</i>         | NC_006158        | 16                |
|                 |                 | <i>Acyrtosiphon pisum</i>          | NC_011594        | Direct submission |
| Coleorrhyncha   | Peloriidiidae   | <i>Hackeriella veitchi</i>         | NC_020309        | 17                |
| Auchenorrhyncha |                 |                                    |                  |                   |
| Cicadomorpha    | Cicadellidae    | <i>Homalodisca vitripennis</i>     | NC_006899        | Direct submission |
|                 | Cercopidae      | <i>Abidama producta</i>            | NC_015799        | 18                |
| Fulgoromorpha   | Fulgoridae      | <i>Lycorma delicatula</i>          | NC_012835        | 19                |
| Heteroptera     | Enicocephalidae | <b><i>Stenopirates sp.</i></b>     | <b>NC_016017</b> | <b>20</b>         |
|                 | Gerridae        | <i>Gerris sp.</i>                  | NC_012841        | 19                |

|              |                                     |                  |           |
|--------------|-------------------------------------|------------------|-----------|
| Nepidae      | <i>Laccotrephes robustus</i>        | NC_012817        | 19        |
| Leptopodidae | <i>Leptopus</i> sp.                 | FJ456946         | 19        |
| Nabidae      | <b><i>Alloeorhynchus bakeri</i></b> | <b>NC_016432</b> | <b>21</b> |
| Pentatomidae | <i>Halyomorpha halys</i>            | NC_013272        | 22        |

---

<sup>a</sup> mitochondrial genome sequences of nine species generated from our previous studies were highlighted in bold.



**Supplementary Table S5.** Best partitioning scheme and model selected by PartitionFinder for phylogenetic analyses.

| Dataset and Partition type | Subset Partitions                                                                                           | Model for MrBayes | Model for RAxML |
|----------------------------|-------------------------------------------------------------------------------------------------------------|-------------------|-----------------|
| PCG-gene partition         | <b>P1:</b> (COII, COIII, COI, CYTB, ATP6, ND3)                                                              | GTR+I+G           | GTR+I+G         |
|                            | <b>P2:</b> (ATP8, ND2, ND6)                                                                                 | GTR+I+G           | GTR+I+G         |
|                            | <b>P3:</b> (ND1, ND4, ND4L, ND5)                                                                            | GTR+I+G           | GTR+I+G         |
| PCG-codon partition        | <b>P1:</b> (COIII_pos1, COII_pos1, COI_pos1, CYTB_pos1)                                                     | GTR+I+G           | GTR+I+G         |
|                            | <b>P2:</b> (COIII_pos2, COII_pos2, COI_pos2, CYTB_pos2, ATP6_pos2)                                          | GTR+I+G           | GTR+I+G         |
|                            | <b>P3:</b> (COIII_pos3, COII_pos3, COI_pos3, CYTB_pos3, ATP6_pos3, ATP8_pos3, ND2_pos3, ND3_pos3, ND6_pos3) | GTR+G             | GTR+I+G         |
|                            | <b>P4:</b> (ATP6_pos1, ATP8_pos1, ND1_pos1, ND2_pos1, ND3_pos1, ND4_pos1, ND4L_pos1, ND5_pos1, ND6_pos1)    | GTR+I+G           | GTR+I+G         |
|                            | <b>P5:</b> (ATP8_pos2, ND1_pos2, ND2_pos2, ND3_pos2, ND4_pos2, ND4L_pos2, ND5_pos2, ND6_pos2)               | GTR+I+G           | GTR+I+G         |
|                            | <b>P6:</b> (ND1_pos3, ND4_pos3, ND4L_pos3, ND5_pos3)                                                        | GTR+G             | GTR+I+G         |
| PCGRNA-gene partition      | <b>P1:</b> (12srRNA, 16srRNA)                                                                               | GTR+I+G           | GTR+I+G         |

|                        |                                                                                                                                                                                                            |         |         |
|------------------------|------------------------------------------------------------------------------------------------------------------------------------------------------------------------------------------------------------|---------|---------|
|                        | <b>P2:</b> (COII, COIII, COI, CYTB, ATP6, ND3)                                                                                                                                                             | GTR+I+G | GTR+I+G |
|                        | <b>P3:</b> (ATP8, ND2, ND6)                                                                                                                                                                                | GTR+I+G | GTR+I+G |
|                        | <b>P4:</b> (ND1, ND4, ND4L, ND5)                                                                                                                                                                           | GTR+I+G | GTR+I+G |
|                        | <b>P5:</b> (tRNA-Arg, tRNA-Asp, tRNA-Cys, tRNA-Gln, tRNA-Glu,<br>tRNA-Gly, tRNA-Ile, tRNA-Leu-cun, tRNA-Leu-uur,<br>tRNA-Lys, tRNA-Phe, tRNA-Pro, tRNA-Ser-ucn, tRNA-Thr,<br>tRNA-Trp, tRNA-Tyr, tRNA-Val) | GTR+I+G | GTR+I+G |
| PCGRNA-codon partition | <b>P1:</b> (12srRNA, 16srRNA)                                                                                                                                                                              | GTR+I+G | GTR+I+G |
|                        | <b>P2:</b> (COIII_pos1, COII_pos1, COI_pos1, CYTB_pos1)                                                                                                                                                    | GTR+I+G | GTR+I+G |
|                        | <b>P3:</b> (COIII_pos2, COII_pos2, COI_pos2, CYTB_pos2,<br>ATP6_pos2)                                                                                                                                      | GTR+I+G | GTR+I+G |
|                        | <b>P4:</b> (COIII_pos3, COII_pos3, COI_pos3, CYTB_pos3,<br>ATP6_pos3, ATP8_pos3, ND2_pos3, ND3_pos3, ND6_pos3)                                                                                             | GTR+G   | GTR+I+G |
|                        | <b>P5:</b> (ATP6_pos1, ATP8_pos1, ND1_pos1, ND2_pos1,<br>ND3_pos1, ND4_pos1, ND4L_pos1, ND5_pos1, ND6_pos1,<br>tRNA-Arg, tRNA-Lys, tRNA-Thr, tRNA-Trp)                                                     | GTR+I+G | GTR+I+G |

|                   |                                                                                                                                                                 |             |             |
|-------------------|-----------------------------------------------------------------------------------------------------------------------------------------------------------------|-------------|-------------|
|                   | <b>P6:</b> (ATP8_pos2, ND1_pos2, ND2_pos2, ND3_pos2,<br>ND4_pos2, ND4L_pos2, ND5_pos2, ND6_pos2)                                                                | GTR+I+G     | GTR+I+G     |
|                   | <b>P7:</b> (ND1_pos3, ND4_pos3, ND4L_pos3, ND5_pos3)                                                                                                            | GTR+G       | GTR+I+G     |
|                   | <b>P8:</b> (tRNA-Asp, tRNA-Cys, tRNA-Gln, tRNA-Glu, tRNA-Gly,<br>tRNA-Ile, tRNA-Leu-cun, tRNA-Leu-uur, tRNA-Phe,<br>tRNA-Pro, tRNA-Ser-ucn, tRNA-Tyr, tRNA-Val) | GTR+I+G     | GTR+I+G     |
| AA-gene partition | <b>P1:</b> (COII, COIII, COI, CYTB, ATP6, ND3)                                                                                                                  | MtREV+I+G+F | MtArt+I+G+F |
|                   | <b>P2:</b> (ATP8, ND2, ND6)                                                                                                                                     | MtREV+I+G+F | MtArt+I+G+F |
|                   | <b>P3:</b> (ND1, ND4, ND4L, ND5)                                                                                                                                | WAG+I+G+F   | MtArt+I+G+F |

---

**Figure S1.** Base composition as calculated based on nucleotide datasets across paraneopteran insects. PCG, protein-coding genes; PCG1, the first codon position of protein-coding genes; PCG2, the second codon position of protein-coding genes; PCG3, the third codon position of protein-coding genes; PCG12, the combined first and second codon positions of protein-coding genes; PCGRNA, the combined protein-coding genes and RNA genes; PCG12RNA, the combined first and second codon positions of protein-coding genes and RNA genes.

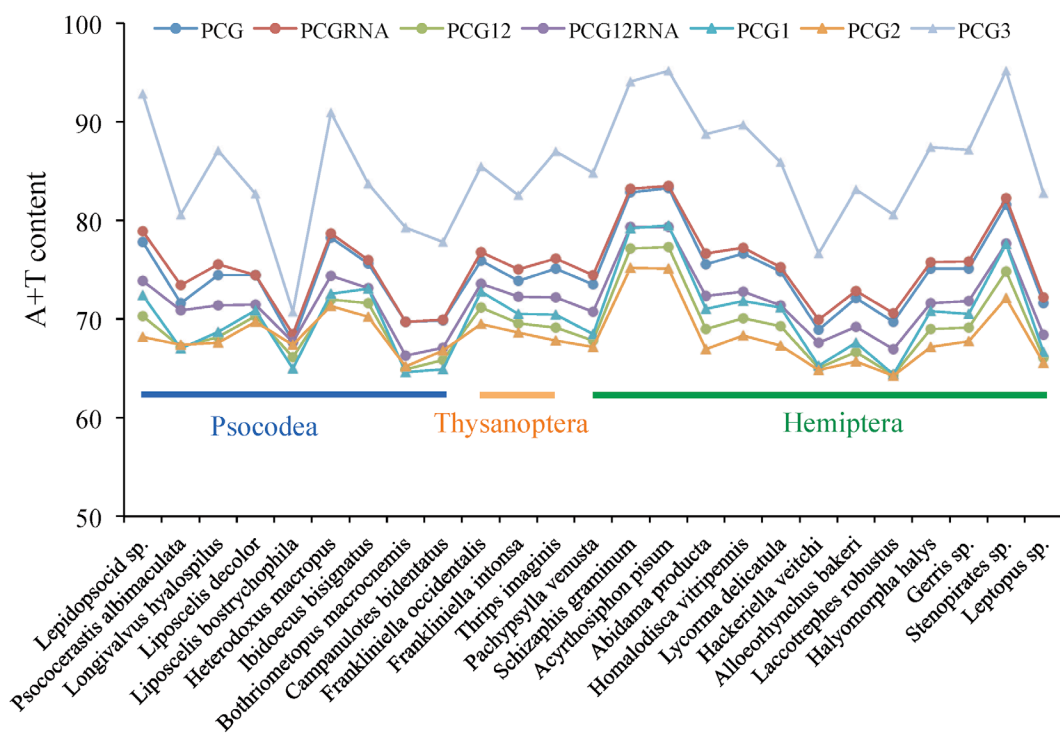

**Figure S2.** Evolutionary rate of the codon position of protein-coding genes. Genetic distance of each codon position was calculated in a pairwise fashion in MEGA v5.1, using *Locusta migratoria* as a reference.

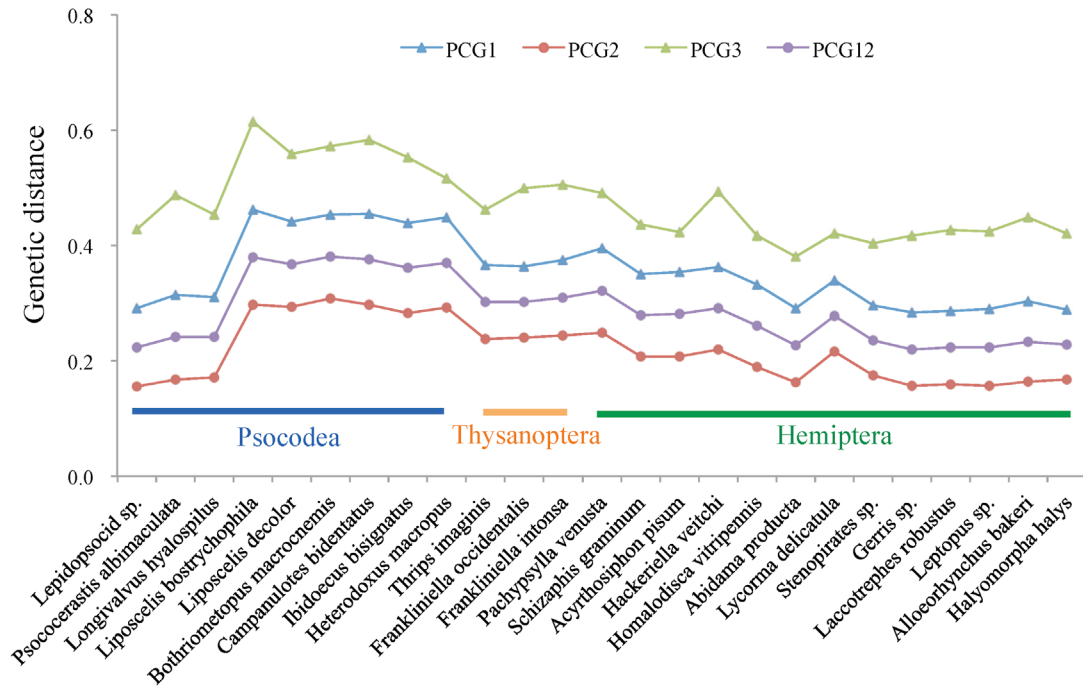

**Figure S3.** AliGROOVE analyses of the codon position of protein-coding genes. The obtained mean similarity score between sequences was represented by a colored square. The scores were ranging from -1, indicating full random similarity, to +1, non-random similarity. The darker red indicated the higher randomized accordancy between pairwise sequence comparisons. Blue indicated the opposite. All taxa names were listed on top and the right hand side of the matrix with different color, black (outgroup), light blue (Psocoptera), dark blue (Phthiraptera), orange (Thysanoptera) and green (Hemiptera).

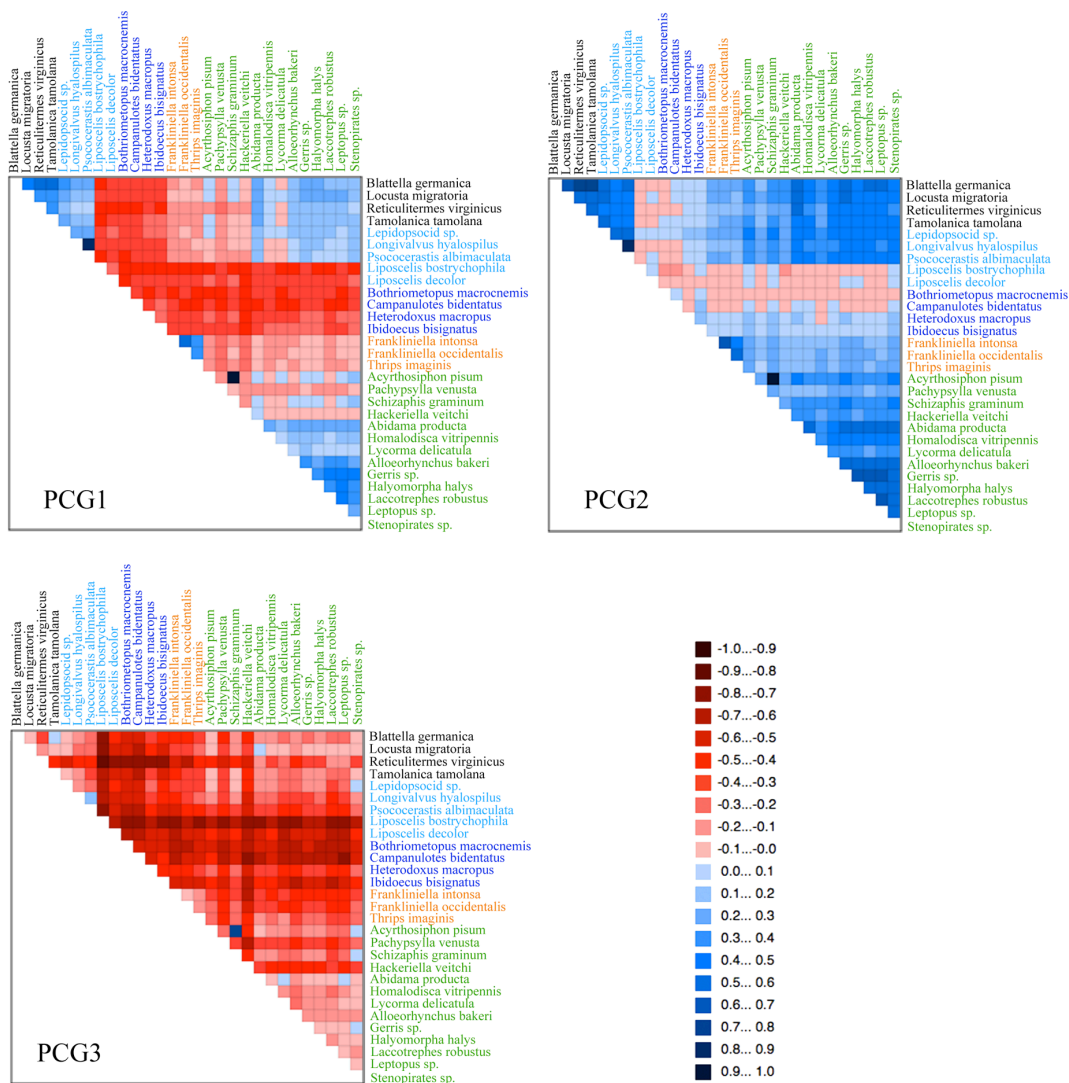



**Figure S5.** Slow-fast analyses of the nucleotide and amino acid datasets. Posterior probabilities using Bayesian CAT+GTR model for various sub-datasets deprived of classes of fast evolving sites (as indicated by the amount of sites left in the datasets). (a) Slow-fast analyses on PCGRNA dataset. (b) Slow-fast analyses on PCG dataset. (c) Slow-fast analyses on AA dataset. Signals support for Psocodea, Thysanoptera and Hemiptera were high, but support for the sister relationship of Thysanoptera and Hemiptera disappeared after removing about 50% of fastest evolving sites in nucleotide datasets. Signal for the sister relationship of Thysanoptera with Phthiraptera and Liposcelididae was stable in amino acid dataset.

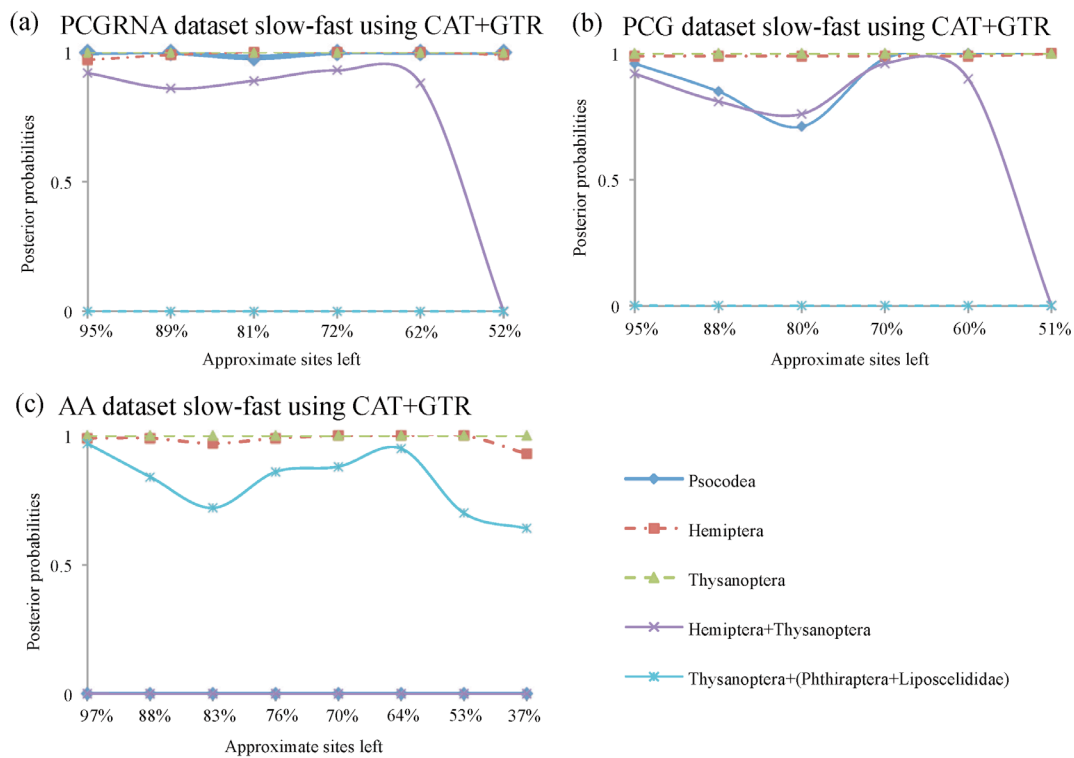



**Figure S6.** Paraneoptera phylogeny inferred from the PCGRNA dataset with the removal of rapidly evolving lineages using PhyloBayes under CAT+GTR model. (a) The rapidly evolving booklice (Psocoptera: Liposcelididae) were excluded. (b) The rapidly evolving parasitic lice (Phthiraptera) were excluded. Values at node represented Bayesian posterior probabilities. The illustrations of the four representative paraneopterans were drawn by H. L.

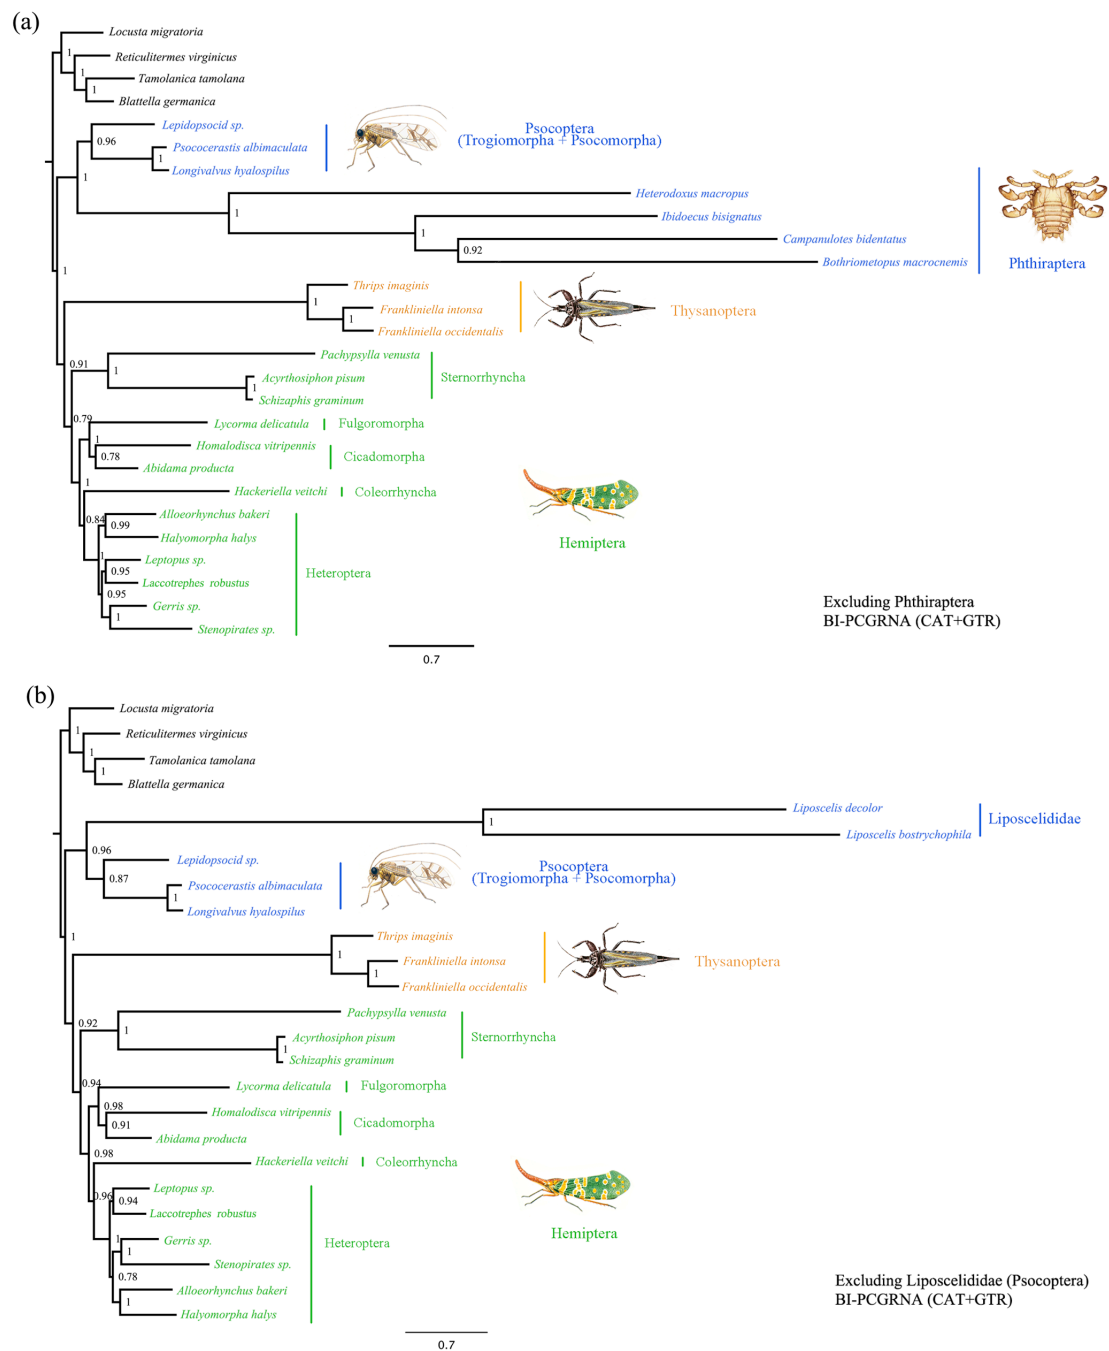

## Supplementary References

1. Cameron, S. L. & Whiting, M. F. Mitochondrial genomic comparisons of the subterranean termites from the genus *Reticulitermes* (Insecta: Isoptera: Rhinotermitidae). *Genome* **50**, 188–202 (2007).
2. Xiao, B. *et al.* Complete mitochondrial genomes of two cockroaches, *Blattella germanica* and *Periplaneta americana*, and the phylogenetic position of termites. *Curr. Genet.* **58**, 65–77 (2012).
3. Cameron, S. L., Barker, S. C. & Whiting, M. F. Mitochondrial genomics and the new insect order Mantophasmatodea. *Mol. Phylogenet. Evol.* **38**, 274–279 (2006).
4. Ma, C. *et al.* Mitochondrial genomes reveal the global phylogeography and dispersal routes of the migratory locust. *Mol. Ecol.* **21**, 4344–4358 (2012).
5. Shao, R., Campbell, N. J. H., Schmidt, E. R. & Barker, S. C. Increased rate of gene rearrangement in the mitochondrial genomes of three orders of hemipteroid insects. *Mol. Biol. Evol.* **18**, 1828–1832 (2001).
6. Li, H. *et al.* Mitochondrial genomes of two barklice, *Psococerastis albimaculata* and *Longivalvus hyalospilus* (Psocoptera: Psocomorpha): contrasting rates in mitochondrial gene rearrangement between major lineages of Psocodea. *PLoS ONE* **8**, e61685 (2013).
7. Wei, D. D. *et al.* The multipartite mitochondrial genome of *Liposcelis bostrychophila*: insights into the evolution of mitochondrial genomes in bilateral animals. *PLoS ONE* **7**, e33973 (2012).
8. Chen, S. C., Wei, D. D., Shao, R., Dou, W. & Wang, J. J. The complete mitochondrial genome of the booklouse, *Liposcelis decolor*: insights into gene arrangement and genome organization within the genus *Liposcelis*. *PLoS ONE* **9**, e91902 (2014).
9. Cameron, S. L., Johnson, K. P. & Whiting, M. F. The mitochondrial genome of the screamer louse *Bothriometopus* (Phthiraptera: Ischnocera): effects of extensive gene rearrangements on the evolution of the genome. *J. Mol. Evol.* **65**, 589–604.

10. Covacin, C., Shao, R., Cameron, S. & Barker, S. C. Extraordinary number of gene rearrangements in the mitochondrial genomes of lice (Phthiraptera: Insecta). *Insect Mol. Biol.* **15**, 63–68 (2006).
11. Cameron, S. L., Yoshizawa, K., Mizukoshi, A., Whiting, M. F. & Johnson, K. P. Mitochondrial genome deletions and minicircles are common in lice (Insecta: Phthiraptera). *BMC Genomics* **12**, 394 (2011).
12. Shao, R., Campbell, N. J. H. & Barker, S. C. Numerous gene rearrangements in the mitochondrial genome of the wallaby louse, *Heterodoxus macropus* (Phthiraptera). *Mol. Biol. Evol.* **18**, 858–865 (2001).
13. Shao, R. & Barker, S.C. The highly rearranged mitochondrial genome of the plague thrips, *Thrips imagines* (Insecta: Thysanoptera): convergence of two novel gene boundaries and an extraordinary arrangement of rRNA genes. *Mol. Biol. Evol.* **20**, 362–370 (2003).
14. Yan, D. K. *et al.* The complete mitochondrial genome sequence of the western flower thrips *Frankliniella occidentalis* (Thysanoptera: Thripidae) contains triplicate putative control regions. *Gene* **506**, 117–124 (2012).
15. Yan, D. K. *et al.* The mitochondrial genome of *Frankliniella intonsa*: insights into the evolution of mitochondrial genomes at lower taxonomic levels in Thysanoptera. *Genomics* **104**, 306–312 (2014).
16. Thao, M. L., Baumann, L. & Baumann, P. Organization of the mitochondrial genomes of whiteflies, aphids, and psyllids (Hemiptera: Sternorrhyncha). *BMC Evol Biol.* **4**, 25 (2004).
17. Cui, Y. *et al.* Phylogenomics of Hemiptera (Insecta: Paraneoptera) based on mitochondrial genomes. *Syst. Entomol.* **38**, 233–245 (2013).
18. Liu, J., Bu, C., Wipfler, B. & Liang, A. Comparative analysis of the mitochondrial genomes of Callitettixini Spittlebugs (Hemiptera: Cercopidae) confirms the overall high evolutionary speed of the AT-rich region but reveals the presence of short conservative elements at the tribal level. *PLoS ONE* **9**, e109140 (2014).

19. Hua, J. M. *et al.* Phylogenetic analysis of the true water bugs (Insecta: Hemiptera: Heteroptera: Nepomorpha): evidence from mitochondrial genomes. *BMC Evol. Biol.* **9**, 134 (2009).
20. Li, H. *et al.* The complete mitochondrial genome and novel gene arrangement of the unique-headed bug *Stenopirates* sp. (Hemiptera: Enicocephalidae). *PLoS ONE* **7**, e29419 (2012).
21. Li, H. *et al.* Comparative mitogenomic analysis of damsel bugs representing three tribes in the family Nabidae (Insecta: Hemiptera). *PLoS ONE* **7**, e45925 (2012).
22. Lee, W. *et al.* Complete mitochondrial genome of brown marmorated stink bug *Halyomorpha halys* (Hemiptera: Pentatomidae), and phylogenetic relationships of hemipteran suborders. *Mol. Cells* **28**, 155–165 (2009).
